# Supplementary material for: Dynamic Evaluation of Water Resources Management Performance in the Yangtze River Economic Belt
Source: MDPI journal article supplement (doi:10.3390/su16020649), 2024-01-11
Supplement: s1 [file s1]

**Table S1. Evaluation results of WRMP level in each province (2012—2021)**

| Year | Province  | Game variable weight |                 | Game combination |                 |
|------|-----------|----------------------|-----------------|------------------|-----------------|
|      |           | Current level        | Trend           | Current level    | Trend           |
| 2012 | Shanghai  | Low                  | —               | Relatively low   | Low             |
|      | Jiangsu   | Relatively high      | High            | Relatively high  | High            |
|      | Zhejiang  | High                 | —               | High             | —               |
|      | Anhui     | Relatively high      | Moderately      | Relatively high  | Moderately      |
|      | Jiangxi   | High                 | —               | High             | —               |
|      | Hubei     | Moderately           | Relatively high | Moderately       | Relatively high |
|      | Hunan     | Low                  | —               | Low              | —               |
|      | Chongqing | Low                  | —               | Low              | —               |
|      | Sichuan   | Low                  | —               | Relatively low   | Low             |
|      | Yunnan    | Low                  | —               | Low              | —               |
|      | Guizhou   | Moderately           | Relatively high | Moderately       | Relatively high |
| 2013 | Shanghai  | Low                  | —               | Moderately       | Relatively high |
|      | Jiangsu   | High                 | —               | High             | —               |
|      | Zhejiang  | High                 | —               | High             | —               |
|      | Anhui     | Relatively high      | High            | Relatively high  | Moderately      |
|      | Jiangxi   | Low                  | —               | Low              | —               |
|      | Hubei     | Low                  | —               | Low              | —               |
|      | Hunan     | Low                  | —               | Moderately       | Relatively low  |
|      | Chongqing | Low                  | —               | Relatively high  | High            |
|      | Sichuan   | Moderately           | Relatively low  | Moderately       | Relatively low  |
|      | Yunnan    | Low                  | —               | Low              | —               |
|      | Guizhou   | Moderately           | Relatively low  | Moderately       | Relatively low  |
| 2014 | Shanghai  | Moderately           | Relatively low  | Moderately       | Relatively low  |
|      | Jiangsu   | High                 | —               | High             | —               |
|      | Zhejiang  | High                 | —               | High             | —               |
|      | Anhui     | Moderately           | Relatively low  | Moderately       | Relatively low  |
|      | Jiangxi   | Relatively high      | High            | Relatively high  | High            |
|      | Hubei     | Relatively high      | High            | Relatively high  | High            |
|      | Hunan     | Relatively high      | High            | Relatively high  | High            |
|      | Chongqing | Relatively high      | High            | Relatively high  | High            |
|      | Sichuan   | Moderately           | Relatively low  | Moderately       | Relatively low  |
|      | Yunnan    | Relatively high      | High            | Relatively high  | High            |
|      | Guizhou   | Relatively low       | Low             | High             | —               |
| 2015 | Shanghai  | Moderately           | Relatively high | Moderately       | Relatively high |
|      | Jiangsu   | High                 | —               | High             | —               |
|      | Zhejiang  | High                 | —               | High             | —               |
|      | Anhui     | Moderately           | Relatively high | Moderately       | Relatively high |

| Year | Province  | Game variable weight |                 | Game combination |                 |
|------|-----------|----------------------|-----------------|------------------|-----------------|
|      |           | Current level        | Trend           | Current level    | Trend           |
|      | Jiangxi   | Moderately           | Relatively high | Moderately       | Relatively high |
|      | Hubei     | Relatively high      | High            | Relatively high  | High            |
|      | Hunan     | Moderately           | Relatively high | Moderately       | Relatively high |
|      | Chongqing | Low                  | —               | Low              | —               |
|      | Sichuan   | Moderately           | Relatively high | Moderately       | Relatively high |
|      | Yunnan    | Relatively high      | Moderately      | Relatively high  | Moderately      |
|      | Guizhou   | Relatively high      | Moderately      | Relatively high  | Moderately      |
| 2016 | Shanghai  | Moderately           | Relatively low  | Moderately       | Relatively low  |
|      | Jiangsu   | High                 | —               | High             | —               |
|      | Zhejiang  | High                 | —               | High             | —               |
|      | Anhui     | High                 | —               | High             | —               |
|      | Jiangxi   | Relatively high      | High            | Relatively high  | High            |
|      | Hubei     | High                 | —               | High             | —               |
|      | Hunan     | Relatively high      | High            | Relatively high  | High            |
|      | Chongqing | low                  | —               | High             | —               |
|      | Sichuan   | Moderately           | Relatively low  | Moderately       | Relatively low  |
|      | Yunnan    | Relatively high      | Moderately      | Relatively high  | Moderately      |
|      | Guizhou   | Relatively high      | Moderately      | Relatively high  | Moderately      |
| 2017 | Shanghai  | low                  | —               | low              | —               |
|      | Jiangsu   | High                 | —               | High             | —               |
|      | Zhejiang  | High                 | —               | High             | —               |
|      | Anhui     | High                 | —               | High             | —               |
|      | Jiangxi   | Relatively high      | Moderately      | Relatively high  | Moderately      |
|      | Hubei     | High                 | —               | High             | —               |
|      | Hunan     | low                  | —               | low              | —               |
|      | Chongqing | low                  | —               | low              | —               |
|      | Sichuan   | Moderately           | Relatively low  | Moderately       | Relatively low  |
|      | Yunnan    | low                  | —               | low              | —               |
|      | Guizhou   | low                  | —               | High             | —               |
| 2018 | Shanghai  | Moderately           | Relatively high | Moderately       | Relatively high |
|      | Jiangsu   | High                 | —               | High             | —               |
|      | Zhejiang  | High                 | —               | High             | —               |
|      | Anhui     | High                 | —               | High             | —               |
|      | Jiangxi   | Relatively high      | High            | Relatively high  | High            |
|      | Hubei     | High                 | —               | High             | —               |
|      | Hunan     | Moderately           | Relatively high | Moderately       | Relatively high |
|      | Chongqing | Low                  | —               | Low              | —               |
|      | Sichuan   | Moderately           | Relatively high | Moderately       | Relatively high |

| Year | Province  | Game variable weight |                | Game combination |                |
|------|-----------|----------------------|----------------|------------------|----------------|
|      |           | Current level        | Trend          | Current level    | Trend          |
|      | Yunnan    | Relatively high      | High           | Relatively high  | High           |
|      | Guizhou   | Relatively high      | Moderately     | Relatively high  | Moderately     |
|      |           |                      |                |                  |                |
| 2019 | Shanghai  | low                  | —              | Moderately       | Relatively low |
|      | Jiangsu   | low                  | —              | High             | —              |
|      | Zhejiang  | High                 | —              | High             | —              |
|      | Anhui     | High                 | —              | High             | —              |
|      | Jiangxi   | High                 | —              | High             | —              |
|      | Hubei     | High                 | —              | High             | —              |
|      | Hunan     | Relatively high      | High           | Relatively high  | High           |
|      | Chongqing | low                  | —              | low              | —              |
|      | Sichuan   | Moderately           | Relatively low | Moderately       | Relatively low |
|      | Yunnan    | low                  | —              | Relatively high  | Moderately     |
|      | Guizhou   | High                 | —              | High             | —              |
|      |           |                      |                |                  |                |
| 2020 | Shanghai  | low                  | —              | High             | —              |
|      | Jiangsu   | High                 | —              | High             | —              |
|      | Zhejiang  | High                 | —              | High             | —              |
|      | Anhui     | High                 | —              | High             | —              |
|      | Jiangxi   | High                 | —              | High             | —              |
|      | Hubei     | High                 | —              | High             | —              |
|      | Hunan     | Relatively high      | High           | Relatively high  | Moderately     |
|      | Chongqing | High                 | —              | High             | —              |
|      | Sichuan   | Moderately           | Relatively low | Moderately       | Relatively low |
|      | Yunnan    | Relatively high      | Moderately     | Relatively high  | Moderately     |
|      | Guizhou   | High                 | —              | High             | —              |
|      |           |                      |                |                  |                |
| 2021 | Shanghai  | High                 | —              | High             | —              |
|      | Jiangsu   | High                 | —              | High             | —              |
|      | Zhejiang  | High                 | —              | High             | —              |
|      | Anhui     | High                 | —              | High             | —              |
|      | Jiangxi   | High                 | —              | High             | —              |
|      | Hubei     | High                 | —              | High             | —              |
|      | Hunan     | High                 | —              | High             | —              |
|      | Chongqing | High                 | —              | High             | —              |
|      | Sichuan   | High                 | —              | High             | —              |
|      | Yunnan    | High                 | —              | High             | —              |
|      | Guizhou   | High                 | —              | High             | —              |
|      |           |                      |                |                  |                |

**Table S2. The variable weight of each evaluation index of 11 provinces (cities) in the Yangtze River Economic Belt (2012—2021).**

| Province (city) | Year | X1    | X2    | X3    | X4    | X5    | X6    | X7    | X8    | X9    | X10   | X11   | X12   | X13   | X14   | X15   | X16   | X17   | X18   | X19   | X20   | X21   | X22   | X23   |
|-----------------|------|-------|-------|-------|-------|-------|-------|-------|-------|-------|-------|-------|-------|-------|-------|-------|-------|-------|-------|-------|-------|-------|-------|-------|
| Shanghai        | 2012 | 0.043 | 0.069 | 0.026 | 0.070 | 0.034 | 0.051 | 0.038 | 0.020 | 0.025 | 0.024 | 0.063 | 0.036 | 0.039 | 0.022 | 0.044 | 0.029 | 0.065 | 0.068 | 0.038 | 0.071 | 0.058 | 0.026 | 0.043 |
|                 | 2013 | 0.044 | 0.063 | 0.024 | 0.070 | 0.032 | 0.050 | 0.039 | 0.019 | 0.024 | 0.023 | 0.058 | 0.035 | 0.045 | 0.020 | 0.045 | 0.030 | 0.065 | 0.070 | 0.038 | 0.073 | 0.064 | 0.026 | 0.044 |
|                 | 2014 | 0.043 | 0.066 | 0.029 | 0.073 | 0.034 | 0.053 | 0.038 | 0.023 | 0.025 | 0.025 | 0.050 | 0.034 | 0.042 | 0.018 | 0.046 | 0.029 | 0.067 | 0.067 | 0.038 | 0.072 | 0.059 | 0.026 | 0.042 |
|                 | 2015 | 0.042 | 0.064 | 0.030 | 0.072 | 0.033 | 0.051 | 0.037 | 0.025 | 0.025 | 0.024 | 0.061 | 0.035 | 0.038 | 0.017 | 0.046 | 0.029 | 0.065 | 0.067 | 0.037 | 0.072 | 0.060 | 0.026 | 0.044 |
|                 | 2016 | 0.042 | 0.065 | 0.029 | 0.072 | 0.033 | 0.051 | 0.037 | 0.024 | 0.025 | 0.024 | 0.058 | 0.036 | 0.037 | 0.017 | 0.048 | 0.029 | 0.063 | 0.067 | 0.036 | 0.072 | 0.063 | 0.026 | 0.044 |
|                 | 2017 | 0.042 | 0.066 | 0.026 | 0.075 | 0.032 | 0.050 | 0.039 | 0.020 | 0.024 | 0.023 | 0.055 | 0.038 | 0.036 | 0.017 | 0.049 | 0.030 | 0.062 | 0.069 | 0.035 | 0.075 | 0.067 | 0.027 | 0.043 |
|                 | 2018 | 0.041 | 0.065 | 0.027 | 0.077 | 0.032 | 0.049 | 0.039 | 0.021 | 0.024 | 0.023 | 0.060 | 0.039 | 0.035 | 0.017 | 0.049 | 0.030 | 0.063 | 0.068 | 0.035 | 0.074 | 0.062 | 0.026 | 0.042 |
|                 | 2019 | 0.041 | 0.065 | 0.028 | 0.076 | 0.032 | 0.050 | 0.038 | 0.023 | 0.024 | 0.023 | 0.066 | 0.041 | 0.034 | 0.017 | 0.049 | 0.030 | 0.064 | 0.068 | 0.034 | 0.074 | 0.061 | 0.026 | 0.037 |
|                 | 2020 | 0.040 | 0.086 | 0.029 | 0.077 | 0.032 | 0.049 | 0.037 | 0.024 | 0.024 | 0.023 | 0.051 | 0.041 | 0.034 | 0.017 | 0.049 | 0.028 | 0.066 | 0.068 | 0.033 | 0.073 | 0.061 | 0.026 | 0.032 |
|                 | 2021 | 0.040 | 0.073 | 0.031 | 0.080 | 0.032 | 0.050 | 0.038 | 0.026 | 0.024 | 0.023 | 0.040 | 0.043 | 0.034 | 0.017 | 0.050 | 0.028 | 0.070 | 0.070 | 0.033 | 0.076 | 0.063 | 0.027 | 0.031 |
| Jiangsu         | 2012 | 0.050 | 0.066 | 0.030 | 0.077 | 0.042 | 0.054 | 0.035 | 0.028 | 0.026 | 0.025 | 0.056 | 0.033 | 0.040 | 0.019 | 0.041 | 0.028 | 0.054 | 0.064 | 0.039 | 0.068 | 0.063 | 0.025 | 0.038 |
|                 | 2013 | 0.051 | 0.066 | 0.029 | 0.078 | 0.042 | 0.054 | 0.036 | 0.027 | 0.026 | 0.026 | 0.057 | 0.032 | 0.039 | 0.019 | 0.042 | 0.024 | 0.055 | 0.064 | 0.039 | 0.068 | 0.063 | 0.026 | 0.037 |
|                 | 2014 | 0.052 | 0.066 | 0.030 | 0.078 | 0.042 | 0.053 | 0.035 | 0.028 | 0.026 | 0.025 | 0.057 | 0.033 | 0.038 | 0.019 | 0.043 | 0.025 | 0.055 | 0.065 | 0.038 | 0.069 | 0.060 | 0.026 | 0.038 |
|                 | 2015 | 0.051 | 0.067 | 0.031 | 0.079 | 0.041 | 0.053 | 0.034 | 0.029 | 0.026 | 0.025 | 0.057 | 0.033 | 0.038 | 0.018 | 0.043 | 0.026 | 0.056 | 0.065 | 0.038 | 0.069 | 0.059 | 0.026 | 0.037 |
|                 | 2016 | 0.051 | 0.067 | 0.031 | 0.080 | 0.040 | 0.052 | 0.034 | 0.029 | 0.025 | 0.025 | 0.055 | 0.034 | 0.037 | 0.018 | 0.045 | 0.026 | 0.055 | 0.065 | 0.038 | 0.070 | 0.061 | 0.026 | 0.034 |
|                 | 2017 | 0.052 | 0.071 | 0.030 | 0.080 | 0.040 | 0.051 | 0.036 | 0.028 | 0.025 | 0.024 | 0.056 | 0.035 | 0.036 | 0.017 | 0.046 | 0.024 | 0.055 | 0.065 | 0.037 | 0.071 | 0.065 | 0.026 | 0.033 |
|                 | 2018 | 0.052 | 0.065 | 0.029 | 0.081 | 0.039 | 0.050 | 0.036 | 0.028 | 0.025 | 0.024 | 0.061 | 0.036 | 0.035 | 0.017 | 0.046 | 0.023 | 0.056 | 0.065 | 0.037 | 0.071 | 0.062 | 0.026 | 0.033 |
|                 | 2019 | 0.055 | 0.065 | 0.027 | 0.084 | 0.039 | 0.049 | 0.038 | 0.026 | 0.024 | 0.023 | 0.062 | 0.038 | 0.034 | 0.017 | 0.048 | 0.018 | 0.054 | 0.067 | 0.036 | 0.074 | 0.066 | 0.027 | 0.031 |
|                 | 2020 | 0.051 | 0.067 | 0.031 | 0.083 | 0.040 | 0.052 | 0.036 | 0.029 | 0.025 | 0.025 | 0.052 | 0.039 | 0.035 | 0.018 | 0.045 | 0.024 | 0.058 | 0.067 | 0.037 | 0.073 | 0.055 | 0.026 | 0.031 |
|                 | 2021 | 0.049 | 0.065 | 0.036 | 0.090 | 0.036 | 0.050 | 0.034 | 0.031 | 0.024 | 0.024 | 0.043 | 0.043 | 0.034 | 0.017 | 0.046 | 0.031 | 0.058 | 0.071 | 0.037 | 0.079 | 0.044 | 0.027 | 0.030 |
| Zhejiang        | 2012 | 0.042 | 0.071 | 0.031 | 0.074 | 0.044 | 0.058 | 0.030 | 0.030 | 0.027 | 0.035 | 0.052 | 0.035 | 0.045 | 0.019 | 0.042 | 0.029 | 0.057 | 0.049 | 0.041 | 0.070 | 0.059 | 0.024 | 0.036 |
|                 | 2013 | 0.042 | 0.072 | 0.030 | 0.075 | 0.043 | 0.058 | 0.030 | 0.029 | 0.027 | 0.034 | 0.055 | 0.035 | 0.043 | 0.019 | 0.042 | 0.028 | 0.056 | 0.049 | 0.041 | 0.069 | 0.065 | 0.024 | 0.036 |
|                 | 2014 | 0.042 | 0.071 | 0.031 | 0.076 | 0.043 | 0.057 | 0.030 | 0.030 | 0.027 | 0.035 | 0.055 | 0.034 | 0.042 | 0.019 | 0.043 | 0.029 | 0.056 | 0.049 | 0.041 | 0.070 | 0.062 | 0.024 | 0.036 |
|                 | 2015 | 0.042 | 0.071 | 0.031 | 0.076 | 0.043 | 0.058 | 0.030 | 0.030 | 0.027 | 0.030 | 0.056 | 0.035 | 0.041 | 0.019 | 0.044 | 0.029 | 0.057 | 0.049 | 0.040 | 0.070 | 0.062 | 0.023 | 0.035 |
|                 | 2016 | 0.041 | 0.073 | 0.031 | 0.078 | 0.043 | 0.056 | 0.029 | 0.031 | 0.026 | 0.026 | 0.059 | 0.034 | 0.039 | 0.018 | 0.048 | 0.030 | 0.056 | 0.047 | 0.040 | 0.073 | 0.065 | 0.024 | 0.033 |

|         |      |       |       |       |       |       |       |       |       |       |       |       |       |       |       |       |       |       |       |       |       |       |       |       |
|---------|------|-------|-------|-------|-------|-------|-------|-------|-------|-------|-------|-------|-------|-------|-------|-------|-------|-------|-------|-------|-------|-------|-------|-------|
|         | 2017 | 0.041 | 0.068 | 0.030 | 0.079 | 0.043 | 0.055 | 0.030 | 0.030 | 0.026 | 0.030 | 0.059 | 0.036 | 0.038 | 0.019 | 0.048 | 0.029 | 0.057 | 0.048 | 0.040 | 0.072 | 0.066 | 0.023 | 0.033 |
|         | 2018 | 0.040 | 0.069 | 0.030 | 0.080 | 0.042 | 0.055 | 0.030 | 0.030 | 0.026 | 0.029 | 0.058 | 0.039 | 0.037 | 0.018 | 0.048 | 0.029 | 0.059 | 0.047 | 0.039 | 0.073 | 0.065 | 0.023 | 0.032 |
|         | 2019 | 0.040 | 0.070 | 0.032 | 0.082 | 0.043 | 0.055 | 0.029 | 0.031 | 0.026 | 0.028 | 0.055 | 0.038 | 0.036 | 0.018 | 0.049 | 0.030 | 0.061 | 0.047 | 0.040 | 0.075 | 0.062 | 0.023 | 0.031 |
|         | 2020 | 0.037 | 0.068 | 0.031 | 0.083 | 0.042 | 0.053 | 0.029 | 0.032 | 0.025 | 0.024 | 0.065 | 0.042 | 0.034 | 0.018 | 0.048 | 0.030 | 0.061 | 0.045 | 0.039 | 0.077 | 0.067 | 0.022 | 0.029 |
|         | 2021 | 0.036 | 0.068 | 0.030 | 0.084 | 0.042 | 0.050 | 0.030 | 0.032 | 0.025 | 0.024 | 0.063 | 0.041 | 0.033 | 0.018 | 0.047 | 0.029 | 0.063 | 0.045 | 0.038 | 0.078 | 0.074 | 0.020 | 0.029 |
| Anhui   | 2012 | 0.045 | 0.069 | 0.027 | 0.067 | 0.047 | 0.054 | 0.032 | 0.029 | 0.029 | 0.028 | 0.058 | 0.031 | 0.039 | 0.021 | 0.037 | 0.028 | 0.062 | 0.060 | 0.043 | 0.069 | 0.062 | 0.025 | 0.036 |
|         | 2013 | 0.046 | 0.067 | 0.025 | 0.069 | 0.047 | 0.052 | 0.033 | 0.031 | 0.028 | 0.027 | 0.065 | 0.028 | 0.037 | 0.019 | 0.037 | 0.029 | 0.061 | 0.061 | 0.043 | 0.068 | 0.065 | 0.026 | 0.035 |
|         | 2014 | 0.045 | 0.069 | 0.028 | 0.070 | 0.046 | 0.055 | 0.032 | 0.029 | 0.029 | 0.029 | 0.060 | 0.031 | 0.038 | 0.020 | 0.039 | 0.028 | 0.063 | 0.060 | 0.042 | 0.067 | 0.062 | 0.025 | 0.036 |
|         | 2015 | 0.045 | 0.070 | 0.029 | 0.069 | 0.046 | 0.054 | 0.032 | 0.030 | 0.028 | 0.027 | 0.059 | 0.031 | 0.037 | 0.019 | 0.039 | 0.028 | 0.063 | 0.060 | 0.042 | 0.068 | 0.063 | 0.025 | 0.035 |
|         | 2016 | 0.045 | 0.069 | 0.030 | 0.070 | 0.046 | 0.053 | 0.031 | 0.030 | 0.028 | 0.028 | 0.058 | 0.031 | 0.037 | 0.019 | 0.044 | 0.028 | 0.061 | 0.060 | 0.041 | 0.068 | 0.062 | 0.025 | 0.035 |
|         | 2017 | 0.044 | 0.069 | 0.027 | 0.071 | 0.046 | 0.052 | 0.032 | 0.030 | 0.027 | 0.027 | 0.062 | 0.031 | 0.036 | 0.019 | 0.045 | 0.028 | 0.061 | 0.060 | 0.041 | 0.070 | 0.065 | 0.024 | 0.034 |
|         | 2018 | 0.044 | 0.072 | 0.028 | 0.072 | 0.045 | 0.053 | 0.032 | 0.030 | 0.027 | 0.026 | 0.060 | 0.032 | 0.036 | 0.019 | 0.045 | 0.028 | 0.062 | 0.060 | 0.041 | 0.069 | 0.063 | 0.024 | 0.035 |
|         | 2019 | 0.044 | 0.066 | 0.025 | 0.073 | 0.045 | 0.053 | 0.033 | 0.030 | 0.027 | 0.026 | 0.062 | 0.033 | 0.036 | 0.018 | 0.046 | 0.027 | 0.062 | 0.060 | 0.040 | 0.070 | 0.066 | 0.024 | 0.034 |
|         | 2020 | 0.044 | 0.068 | 0.030 | 0.073 | 0.045 | 0.055 | 0.031 | 0.030 | 0.028 | 0.027 | 0.062 | 0.034 | 0.037 | 0.019 | 0.040 | 0.028 | 0.064 | 0.060 | 0.040 | 0.069 | 0.057 | 0.023 | 0.034 |
|         | 2021 | 0.044 | 0.068 | 0.037 | 0.075 | 0.045 | 0.052 | 0.027 | 0.032 | 0.026 | 0.025 | 0.067 | 0.036 | 0.035 | 0.018 | 0.037 | 0.031 | 0.065 | 0.062 | 0.040 | 0.073 | 0.047 | 0.023 | 0.034 |
| Jiangxi | 2012 | 0.047 | 0.073 | 0.032 | 0.066 | 0.051 | 0.053 | 0.028 | 0.031 | 0.029 | 0.026 | 0.049 | 0.029 | 0.050 | 0.022 | 0.034 | 0.030 | 0.071 | 0.047 | 0.044 | 0.070 | 0.058 | 0.027 | 0.033 |
|         | 2013 | 0.047 | 0.071 | 0.030 | 0.066 | 0.048 | 0.065 | 0.029 | 0.029 | 0.028 | 0.025 | 0.055 | 0.031 | 0.048 | 0.020 | 0.035 | 0.028 | 0.068 | 0.047 | 0.041 | 0.067 | 0.064 | 0.025 | 0.032 |
|         | 2014 | 0.046 | 0.072 | 0.030 | 0.067 | 0.047 | 0.063 | 0.029 | 0.029 | 0.028 | 0.026 | 0.057 | 0.032 | 0.047 | 0.020 | 0.036 | 0.028 | 0.068 | 0.047 | 0.041 | 0.067 | 0.061 | 0.025 | 0.033 |
|         | 2015 | 0.046 | 0.070 | 0.031 | 0.068 | 0.047 | 0.063 | 0.029 | 0.029 | 0.029 | 0.027 | 0.053 | 0.033 | 0.044 | 0.020 | 0.038 | 0.028 | 0.068 | 0.048 | 0.041 | 0.067 | 0.061 | 0.025 | 0.033 |
|         | 2016 | 0.046 | 0.070 | 0.031 | 0.068 | 0.047 | 0.063 | 0.029 | 0.029 | 0.029 | 0.027 | 0.055 | 0.032 | 0.042 | 0.020 | 0.042 | 0.028 | 0.068 | 0.048 | 0.041 | 0.066 | 0.062 | 0.025 | 0.033 |
|         | 2017 | 0.046 | 0.067 | 0.031 | 0.070 | 0.047 | 0.062 | 0.029 | 0.030 | 0.029 | 0.026 | 0.055 | 0.033 | 0.038 | 0.019 | 0.043 | 0.028 | 0.070 | 0.047 | 0.041 | 0.067 | 0.064 | 0.025 | 0.032 |
|         | 2018 | 0.046 | 0.066 | 0.029 | 0.070 | 0.047 | 0.063 | 0.030 | 0.030 | 0.028 | 0.025 | 0.058 | 0.033 | 0.037 | 0.018 | 0.044 | 0.029 | 0.071 | 0.046 | 0.041 | 0.069 | 0.065 | 0.026 | 0.031 |
|         | 2019 | 0.046 | 0.067 | 0.031 | 0.072 | 0.047 | 0.060 | 0.028 | 0.030 | 0.028 | 0.026 | 0.055 | 0.034 | 0.037 | 0.018 | 0.045 | 0.029 | 0.073 | 0.046 | 0.041 | 0.071 | 0.059 | 0.026 | 0.031 |
|         | 2020 | 0.047 | 0.063 | 0.031 | 0.074 | 0.048 | 0.052 | 0.029 | 0.032 | 0.027 | 0.025 | 0.055 | 0.036 | 0.035 | 0.018 | 0.038 | 0.030 | 0.076 | 0.045 | 0.041 | 0.076 | 0.066 | 0.026 | 0.030 |
|         | 2021 | 0.048 | 0.056 | 0.031 | 0.076 | 0.048 | 0.050 | 0.029 | 0.033 | 0.027 | 0.024 | 0.055 | 0.037 | 0.032 | 0.017 | 0.032 | 0.031 | 0.081 | 0.043 | 0.040 | 0.078 | 0.077 | 0.026 | 0.029 |
| Hubei   | 2012 | 0.045 | 0.072 | 0.027 | 0.072 | 0.048 | 0.054 | 0.032 | 0.030 | 0.028 | 0.025 | 0.055 | 0.033 | 0.045 | 0.027 | 0.036 | 0.029 | 0.053 | 0.055 | 0.042 | 0.070 | 0.063 | 0.027 | 0.032 |

|           |      |       |       |       |       |       |       |       |       |       |       |       |       |       |       |       |       |       |       |       |       |       |       |       |
|-----------|------|-------|-------|-------|-------|-------|-------|-------|-------|-------|-------|-------|-------|-------|-------|-------|-------|-------|-------|-------|-------|-------|-------|-------|
|           | 2013 | 0.045 | 0.072 | 0.027 | 0.068 | 0.048 | 0.055 | 0.032 | 0.030 | 0.028 | 0.026 | 0.062 | 0.035 | 0.041 | 0.022 | 0.037 | 0.029 | 0.055 | 0.055 | 0.042 | 0.070 | 0.063 | 0.026 | 0.032 |
|           | 2014 | 0.045 | 0.072 | 0.028 | 0.069 | 0.047 | 0.055 | 0.031 | 0.029 | 0.028 | 0.026 | 0.061 | 0.034 | 0.040 | 0.021 | 0.039 | 0.028 | 0.056 | 0.055 | 0.041 | 0.069 | 0.062 | 0.026 | 0.036 |
|           | 2015 | 0.046 | 0.072 | 0.029 | 0.067 | 0.047 | 0.056 | 0.031 | 0.029 | 0.028 | 0.027 | 0.058 | 0.036 | 0.040 | 0.021 | 0.040 | 0.028 | 0.059 | 0.055 | 0.041 | 0.068 | 0.062 | 0.026 | 0.035 |
|           | 2016 | 0.045 | 0.064 | 0.030 | 0.067 | 0.048 | 0.054 | 0.030 | 0.031 | 0.027 | 0.026 | 0.062 | 0.033 | 0.039 | 0.020 | 0.046 | 0.030 | 0.057 | 0.056 | 0.042 | 0.071 | 0.062 | 0.027 | 0.032 |
|           | 2017 | 0.045 | 0.065 | 0.030 | 0.068 | 0.047 | 0.055 | 0.031 | 0.030 | 0.028 | 0.030 | 0.058 | 0.034 | 0.039 | 0.019 | 0.045 | 0.029 | 0.059 | 0.055 | 0.041 | 0.069 | 0.064 | 0.026 | 0.035 |
|           | 2018 | 0.046 | 0.064 | 0.027 | 0.070 | 0.047 | 0.053 | 0.032 | 0.030 | 0.027 | 0.026 | 0.059 | 0.036 | 0.037 | 0.018 | 0.047 | 0.030 | 0.060 | 0.055 | 0.040 | 0.071 | 0.066 | 0.027 | 0.032 |
|           | 2019 | 0.046 | 0.068 | 0.025 | 0.071 | 0.047 | 0.053 | 0.033 | 0.030 | 0.027 | 0.025 | 0.056 | 0.037 | 0.036 | 0.018 | 0.048 | 0.030 | 0.061 | 0.055 | 0.040 | 0.071 | 0.066 | 0.027 | 0.031 |
|           | 2020 | 0.046 | 0.068 | 0.031 | 0.071 | 0.047 | 0.055 | 0.030 | 0.031 | 0.028 | 0.027 | 0.063 | 0.038 | 0.037 | 0.019 | 0.040 | 0.030 | 0.064 | 0.057 | 0.039 | 0.071 | 0.055 | 0.022 | 0.032 |
|           | 2021 | 0.045 | 0.064 | 0.041 | 0.069 | 0.049 | 0.052 | 0.025 | 0.034 | 0.026 | 0.025 | 0.068 | 0.043 | 0.035 | 0.018 | 0.034 | 0.033 | 0.066 | 0.057 | 0.036 | 0.077 | 0.054 | 0.018 | 0.031 |
| Hunan     | 2012 | 0.044 | 0.066 | 0.030 | 0.062 | 0.048 | 0.070 | 0.029 | 0.029 | 0.030 | 0.037 | 0.053 | 0.035 | 0.045 | 0.020 | 0.033 | 0.028 | 0.064 | 0.051 | 0.045 | 0.066 | 0.058 | 0.025 | 0.031 |
|           | 2013 | 0.044 | 0.068 | 0.029 | 0.066 | 0.047 | 0.067 | 0.030 | 0.028 | 0.030 | 0.031 | 0.055 | 0.034 | 0.042 | 0.020 | 0.036 | 0.027 | 0.065 | 0.052 | 0.043 | 0.065 | 0.062 | 0.024 | 0.034 |
|           | 2014 | 0.044 | 0.067 | 0.030 | 0.066 | 0.047 | 0.066 | 0.030 | 0.029 | 0.030 | 0.028 | 0.058 | 0.035 | 0.041 | 0.019 | 0.036 | 0.028 | 0.065 | 0.052 | 0.043 | 0.065 | 0.061 | 0.025 | 0.035 |
|           | 2015 | 0.045 | 0.068 | 0.030 | 0.067 | 0.046 | 0.067 | 0.030 | 0.029 | 0.029 | 0.028 | 0.058 | 0.031 | 0.039 | 0.019 | 0.037 | 0.028 | 0.065 | 0.052 | 0.044 | 0.065 | 0.062 | 0.025 | 0.035 |
|           | 2016 | 0.044 | 0.069 | 0.030 | 0.066 | 0.045 | 0.068 | 0.029 | 0.028 | 0.030 | 0.031 | 0.054 | 0.035 | 0.038 | 0.019 | 0.043 | 0.027 | 0.065 | 0.052 | 0.043 | 0.065 | 0.060 | 0.024 | 0.035 |
|           | 2017 | 0.044 | 0.067 | 0.030 | 0.066 | 0.045 | 0.068 | 0.029 | 0.029 | 0.030 | 0.027 | 0.057 | 0.036 | 0.038 | 0.019 | 0.044 | 0.028 | 0.064 | 0.051 | 0.043 | 0.066 | 0.062 | 0.025 | 0.031 |
|           | 2018 | 0.044 | 0.070 | 0.029 | 0.066 | 0.044 | 0.064 | 0.030 | 0.028 | 0.030 | 0.031 | 0.056 | 0.035 | 0.037 | 0.019 | 0.043 | 0.027 | 0.064 | 0.052 | 0.042 | 0.065 | 0.062 | 0.024 | 0.034 |
|           | 2019 | 0.044 | 0.069 | 0.030 | 0.068 | 0.045 | 0.061 | 0.029 | 0.029 | 0.029 | 0.030 | 0.059 | 0.036 | 0.034 | 0.019 | 0.045 | 0.028 | 0.066 | 0.051 | 0.043 | 0.067 | 0.059 | 0.025 | 0.034 |
|           | 2020 | 0.044 | 0.065 | 0.031 | 0.070 | 0.045 | 0.058 | 0.030 | 0.029 | 0.028 | 0.029 | 0.059 | 0.037 | 0.037 | 0.019 | 0.039 | 0.028 | 0.068 | 0.052 | 0.043 | 0.068 | 0.063 | 0.024 | 0.033 |
|           | 2021 | 0.044 | 0.058 | 0.032 | 0.074 | 0.046 | 0.051 | 0.029 | 0.032 | 0.026 | 0.025 | 0.062 | 0.039 | 0.039 | 0.018 | 0.034 | 0.030 | 0.071 | 0.051 | 0.045 | 0.073 | 0.070 | 0.023 | 0.030 |
| Chongqing | 2012 | 0.039 | 0.082 | 0.030 | 0.066 | 0.049 | 0.073 | 0.029 | 0.030 | 0.033 | 0.025 | 0.047 | 0.031 | 0.043 | 0.018 | 0.038 | 0.029 | 0.065 | 0.055 | 0.032 | 0.066 | 0.063 | 0.025 | 0.032 |
|           | 2013 | 0.038 | 0.081 | 0.029 | 0.067 | 0.048 | 0.072 | 0.029 | 0.029 | 0.030 | 0.025 | 0.060 | 0.032 | 0.038 | 0.018 | 0.039 | 0.028 | 0.064 | 0.054 | 0.032 | 0.066 | 0.062 | 0.025 | 0.033 |
|           | 2014 | 0.038 | 0.080 | 0.030 | 0.068 | 0.047 | 0.072 | 0.028 | 0.029 | 0.029 | 0.027 | 0.059 | 0.033 | 0.039 | 0.018 | 0.040 | 0.028 | 0.064 | 0.052 | 0.032 | 0.067 | 0.060 | 0.025 | 0.032 |
|           | 2015 | 0.038 | 0.081 | 0.030 | 0.069 | 0.048 | 0.072 | 0.029 | 0.029 | 0.029 | 0.025 | 0.056 | 0.035 | 0.037 | 0.018 | 0.041 | 0.029 | 0.064 | 0.052 | 0.031 | 0.067 | 0.064 | 0.025 | 0.032 |
|           | 2016 | 0.036 | 0.082 | 0.030 | 0.069 | 0.048 | 0.073 | 0.027 | 0.030 | 0.028 | 0.024 | 0.061 | 0.035 | 0.034 | 0.017 | 0.047 | 0.029 | 0.064 | 0.051 | 0.029 | 0.069 | 0.060 | 0.025 | 0.031 |
|           | 2017 | 0.036 | 0.081 | 0.030 | 0.070 | 0.048 | 0.071 | 0.027 | 0.030 | 0.027 | 0.024 | 0.065 | 0.033 | 0.035 | 0.017 | 0.047 | 0.029 | 0.064 | 0.051 | 0.029 | 0.070 | 0.062 | 0.025 | 0.030 |
|           | 2018 | 0.036 | 0.080 | 0.030 | 0.069 | 0.047 | 0.071 | 0.028 | 0.030 | 0.027 | 0.024 | 0.062 | 0.036 | 0.035 | 0.017 | 0.047 | 0.029 | 0.065 | 0.051 | 0.030 | 0.069 | 0.063 | 0.025 | 0.031 |

|         |      |       |       |       |       |       |       |       |       |       |       |       |       |       |       |       |       |       |       |       |       |       |       |       |
|---------|------|-------|-------|-------|-------|-------|-------|-------|-------|-------|-------|-------|-------|-------|-------|-------|-------|-------|-------|-------|-------|-------|-------|-------|
|         | 2019 | 0.037 | 0.079 | 0.030 | 0.070 | 0.047 | 0.068 | 0.028 | 0.030 | 0.028 | 0.025 | 0.060 | 0.036 | 0.035 | 0.021 | 0.047 | 0.029 | 0.066 | 0.052 | 0.031 | 0.068 | 0.062 | 0.024 | 0.029 |
|         | 2020 | 0.037 | 0.074 | 0.032 | 0.072 | 0.047 | 0.055 | 0.028 | 0.030 | 0.033 | 0.025 | 0.065 | 0.038 | 0.035 | 0.020 | 0.045 | 0.028 | 0.068 | 0.053 | 0.032 | 0.068 | 0.060 | 0.024 | 0.030 |
|         | 2021 | 0.036 | 0.067 | 0.033 | 0.074 | 0.048 | 0.064 | 0.026 | 0.031 | 0.038 | 0.025 | 0.064 | 0.039 | 0.033 | 0.018 | 0.043 | 0.027 | 0.069 | 0.053 | 0.031 | 0.069 | 0.057 | 0.023 | 0.030 |
| Sichuan | 2012 | 0.040 | 0.076 | 0.031 | 0.064 | 0.049 | 0.056 | 0.028 | 0.029 | 0.035 | 0.035 | 0.046 | 0.035 | 0.047 | 0.021 | 0.035 | 0.028 | 0.066 | 0.056 | 0.042 | 0.065 | 0.060 | 0.025 | 0.034 |
|         | 2013 | 0.039 | 0.073 | 0.031 | 0.067 | 0.049 | 0.055 | 0.028 | 0.029 | 0.035 | 0.026 | 0.057 | 0.035 | 0.047 | 0.020 | 0.036 | 0.027 | 0.066 | 0.055 | 0.041 | 0.066 | 0.062 | 0.024 | 0.034 |
|         | 2014 | 0.040 | 0.073 | 0.031 | 0.067 | 0.048 | 0.058 | 0.028 | 0.029 | 0.036 | 0.027 | 0.054 | 0.034 | 0.045 | 0.020 | 0.037 | 0.028 | 0.066 | 0.055 | 0.041 | 0.065 | 0.061 | 0.024 | 0.035 |
|         | 2015 | 0.041 | 0.075 | 0.031 | 0.065 | 0.048 | 0.058 | 0.029 | 0.029 | 0.034 | 0.027 | 0.048 | 0.036 | 0.043 | 0.020 | 0.038 | 0.028 | 0.067 | 0.055 | 0.041 | 0.066 | 0.062 | 0.024 | 0.036 |
|         | 2016 | 0.041 | 0.071 | 0.031 | 0.065 | 0.047 | 0.059 | 0.029 | 0.028 | 0.033 | 0.027 | 0.054 | 0.035 | 0.042 | 0.020 | 0.043 | 0.027 | 0.067 | 0.055 | 0.040 | 0.065 | 0.061 | 0.023 | 0.035 |
|         | 2017 | 0.041 | 0.067 | 0.031 | 0.066 | 0.047 | 0.057 | 0.029 | 0.029 | 0.032 | 0.029 | 0.057 | 0.035 | 0.041 | 0.020 | 0.044 | 0.027 | 0.068 | 0.056 | 0.040 | 0.066 | 0.061 | 0.024 | 0.035 |
|         | 2018 | 0.040 | 0.072 | 0.031 | 0.065 | 0.048 | 0.055 | 0.028 | 0.029 | 0.031 | 0.027 | 0.060 | 0.035 | 0.039 | 0.019 | 0.045 | 0.028 | 0.068 | 0.055 | 0.039 | 0.067 | 0.061 | 0.024 | 0.033 |
|         | 2019 | 0.040 | 0.072 | 0.031 | 0.067 | 0.048 | 0.056 | 0.028 | 0.029 | 0.031 | 0.027 | 0.057 | 0.036 | 0.037 | 0.019 | 0.045 | 0.028 | 0.070 | 0.055 | 0.039 | 0.068 | 0.063 | 0.024 | 0.032 |
|         | 2020 | 0.039 | 0.069 | 0.032 | 0.067 | 0.048 | 0.060 | 0.027 | 0.030 | 0.028 | 0.025 | 0.062 | 0.037 | 0.036 | 0.018 | 0.041 | 0.029 | 0.072 | 0.055 | 0.038 | 0.070 | 0.062 | 0.024 | 0.030 |
|         | 2021 | 0.038 | 0.065 | 0.033 | 0.069 | 0.050 | 0.053 | 0.026 | 0.032 | 0.025 | 0.025 | 0.067 | 0.038 | 0.034 | 0.018 | 0.037 | 0.031 | 0.076 | 0.056 | 0.037 | 0.074 | 0.062 | 0.024 | 0.030 |
| Yunnan  | 2012 | 0.040 | 0.087 | 0.031 | 0.059 | 0.048 | 0.075 | 0.027 | 0.030 | 0.033 | 0.025 | 0.044 | 0.033 | 0.037 | 0.023 | 0.035 | 0.029 | 0.063 | 0.050 | 0.044 | 0.065 | 0.062 | 0.026 | 0.034 |
|         | 2013 | 0.040 | 0.083 | 0.031 | 0.061 | 0.047 | 0.069 | 0.028 | 0.029 | 0.028 | 0.027 | 0.057 | 0.031 | 0.040 | 0.022 | 0.037 | 0.028 | 0.063 | 0.050 | 0.044 | 0.064 | 0.062 | 0.025 | 0.034 |
|         | 2014 | 0.040 | 0.086 | 0.032 | 0.063 | 0.048 | 0.055 | 0.028 | 0.030 | 0.029 | 0.026 | 0.059 | 0.034 | 0.041 | 0.020 | 0.038 | 0.029 | 0.063 | 0.049 | 0.045 | 0.066 | 0.063 | 0.025 | 0.034 |
|         | 2015 | 0.041 | 0.084 | 0.032 | 0.063 | 0.048 | 0.056 | 0.028 | 0.030 | 0.029 | 0.027 | 0.057 | 0.035 | 0.041 | 0.021 | 0.039 | 0.028 | 0.062 | 0.050 | 0.044 | 0.065 | 0.062 | 0.025 | 0.033 |
|         | 2016 | 0.040 | 0.087 | 0.032 | 0.061 | 0.048 | 0.052 | 0.027 | 0.030 | 0.030 | 0.025 | 0.060 | 0.035 | 0.040 | 0.020 | 0.046 | 0.029 | 0.061 | 0.048 | 0.044 | 0.065 | 0.063 | 0.025 | 0.032 |
|         | 2017 | 0.040 | 0.085 | 0.032 | 0.061 | 0.048 | 0.052 | 0.027 | 0.030 | 0.030 | 0.025 | 0.061 | 0.036 | 0.038 | 0.020 | 0.047 | 0.029 | 0.061 | 0.048 | 0.045 | 0.065 | 0.063 | 0.024 | 0.032 |
|         | 2018 | 0.039 | 0.088 | 0.032 | 0.062 | 0.048 | 0.053 | 0.026 | 0.031 | 0.030 | 0.025 | 0.063 | 0.036 | 0.036 | 0.018 | 0.047 | 0.029 | 0.063 | 0.047 | 0.044 | 0.065 | 0.063 | 0.024 | 0.031 |
|         | 2019 | 0.039 | 0.085 | 0.031 | 0.065 | 0.048 | 0.052 | 0.027 | 0.030 | 0.029 | 0.026 | 0.061 | 0.037 | 0.036 | 0.018 | 0.046 | 0.028 | 0.065 | 0.048 | 0.044 | 0.064 | 0.064 | 0.023 | 0.034 |
|         | 2020 | 0.040 | 0.088 | 0.032 | 0.065 | 0.048 | 0.053 | 0.028 | 0.031 | 0.028 | 0.026 | 0.058 | 0.038 | 0.035 | 0.018 | 0.041 | 0.029 | 0.067 | 0.048 | 0.044 | 0.065 | 0.063 | 0.024 | 0.032 |
|         | 2021 | 0.041 | 0.089 | 0.032 | 0.064 | 0.049 | 0.055 | 0.027 | 0.031 | 0.027 | 0.031 | 0.055 | 0.039 | 0.034 | 0.018 | 0.036 | 0.030 | 0.068 | 0.049 | 0.044 | 0.065 | 0.060 | 0.024 | 0.032 |
| Guizhou | 2012 | 0.038 | 0.062 | 0.031 | 0.055 | 0.053 | 0.054 | 0.027 | 0.031 | 0.037 | 0.024 | 0.059 | 0.035 | 0.041 | 0.020 | 0.035 | 0.030 | 0.075 | 0.055 | 0.047 | 0.072 | 0.060 | 0.027 | 0.029 |
|         | 2013 | 0.039 | 0.070 | 0.031 | 0.056 | 0.050 | 0.056 | 0.028 | 0.030 | 0.034 | 0.031 | 0.059 | 0.033 | 0.038 | 0.021 | 0.037 | 0.029 | 0.073 | 0.056 | 0.043 | 0.063 | 0.064 | 0.025 | 0.032 |
|         | 2014 | 0.039 | 0.068 | 0.032 | 0.058 | 0.052 | 0.057 | 0.027 | 0.031 | 0.033 | 0.026 | 0.063 | 0.031 | 0.038 | 0.020 | 0.039 | 0.029 | 0.075 | 0.053 | 0.044 | 0.066 | 0.060 | 0.026 | 0.032 |



|      |       |       |       |       |       |       |       |       |       |       |       |       |       |       |       |       |       |       |       |       |       |       |       |
|------|-------|-------|-------|-------|-------|-------|-------|-------|-------|-------|-------|-------|-------|-------|-------|-------|-------|-------|-------|-------|-------|-------|-------|
| 2015 | 0.039 | 0.067 | 0.032 | 0.061 | 0.050 | 0.057 | 0.028 | 0.030 | 0.031 | 0.026 | 0.062 | 0.033 | 0.037 | 0.020 | 0.040 | 0.029 | 0.074 | 0.053 | 0.044 | 0.065 | 0.063 | 0.026 | 0.033 |
| 2016 | 0.040 | 0.066 | 0.032 | 0.063 | 0.050 | 0.058 | 0.028 | 0.030 | 0.031 | 0.026 | 0.057 | 0.035 | 0.038 | 0.020 | 0.045 | 0.029 | 0.074 | 0.053 | 0.042 | 0.063 | 0.064 | 0.026 | 0.032 |
| 2017 | 0.040 | 0.068 | 0.032 | 0.063 | 0.049 | 0.061 | 0.028 | 0.030 | 0.030 | 0.026 | 0.055 | 0.032 | 0.038 | 0.020 | 0.045 | 0.029 | 0.076 | 0.053 | 0.042 | 0.064 | 0.063 | 0.026 | 0.031 |
| 2018 | 0.039 | 0.066 | 0.031 | 0.063 | 0.049 | 0.056 | 0.028 | 0.030 | 0.030 | 0.026 | 0.063 | 0.037 | 0.035 | 0.019 | 0.046 | 0.029 | 0.077 | 0.053 | 0.042 | 0.059 | 0.064 | 0.026 | 0.030 |
| 2019 | 0.039 | 0.063 | 0.032 | 0.065 | 0.050 | 0.054 | 0.027 | 0.032 | 0.028 | 0.025 | 0.064 | 0.039 | 0.035 | 0.019 | 0.048 | 0.030 | 0.081 | 0.053 | 0.042 | 0.055 | 0.064 | 0.027 | 0.029 |
| 2020 | 0.037 | 0.062 | 0.034 | 0.070 | 0.052 | 0.054 | 0.027 | 0.033 | 0.027 | 0.025 | 0.067 | 0.044 | 0.035 | 0.018 | 0.031 | 0.032 | 0.086 | 0.053 | 0.043 | 0.051 | 0.065 | 0.026 | 0.029 |
| 2021 | 0.034 | 0.061 | 0.035 | 0.077 | 0.053 | 0.048 | 0.025 | 0.034 | 0.026 | 0.024 | 0.069 | 0.044 | 0.034 | 0.018 | 0.034 | 0.033 | 0.090 | 0.053 | 0.043 | 0.046 | 0.066 | 0.025 | 0.028 |

---

**Table S3. Initial constant weight of indicators.**

| Primary indicators | Primary weights | Secondary indicators   | Secondary weights | Tertiary indicators | Subjective weights | Objective weights | Game portfolio weights |
|--------------------|-----------------|------------------------|-------------------|---------------------|--------------------|-------------------|------------------------|
| WRU                | 0.443           | Economical Utilization | 0.149             | X1                  | 0.047              | 0.043             | 0.045                  |
|                    |                 |                        |                   | X2                  | 0.047              | 0.102             | 0.073                  |
|                    |                 |                        |                   | X3                  | 0.034              | 0.027             | 0.031                  |
|                    |                 | Intensive Utilization  | 0.174             | X4                  | 0.047              | 0.092             | 0.069                  |
|                    |                 |                        |                   | X5                  | 0.053              | 0.032             | 0.043                  |
|                    |                 |                        |                   | X6                  | 0.053              | 0.073             | 0.063                  |
|                    |                 | Safe utilization       | 0.120             | X7                  | 0.053              | 0.009             | 0.032                  |
|                    |                 |                        |                   | X8                  | 0.043              | 0.006             | 0.025                  |
|                    |                 |                        |                   | X9                  | 0.045              | 0.017             | 0.031                  |
|                    |                 |                        |                   | X10                 | 0.042              | 0.020             | 0.032                  |
| WET                | 0.282           | Pollution reduction    | 0.192             | X11                 | 0.044              | 0.066             | 0.054                  |
|                    |                 |                        |                   | X12                 | 0.041              | 0.026             | 0.034                  |
|                    |                 |                        |                   | X13                 | 0.043              | 0.040             | 0.041                  |
|                    |                 |                        |                   | X14                 | 0.032              | 0.013             | 0.023                  |
|                    |                 | Carbon reduction       | 0.090             | X15                 | 0.058              | 0.020             | 0.040                  |
|                    |                 |                        |                   | X16                 | 0.028              | 0.020             | 0.024                  |
|                    |                 |                        |                   | X17                 | 0.050              | 0.084             | 0.066                  |
| WEP                | 0.275           | Green expansion        | 0.157             | X18                 | 0.062              | 0.052             | 0.057                  |
|                    |                 |                        |                   | X19                 | 0.048              | 0.028             | 0.039                  |
|                    |                 |                        |                   | X20                 | 0.031              | 0.094             | 0.061                  |
|                    |                 | Growth                 | 0.118             | X21                 | 0.028              | 0.092             | 0.059                  |
|                    |                 |                        |                   | X22                 | 0.028              | 0.016             | 0.022                  |
|                    |                 |                        |                   | X23                 | 0.043              | 0.030             | 0.037                  |

**Table S4. The correlation degree and correlation level of the provinces (cities) in the YREB (2012-2021).**

| Province (city) | Year | Correlation degree |        |        |        |        |       | Grade |
|-----------------|------|--------------------|--------|--------|--------|--------|-------|-------|
|                 |      | I                  | II     | III    | IV     | V      | j*    |       |
| Shanghai        | 2012 | -0.450             | -0.438 | -0.342 | -0.281 | -0.269 | 4.108 | V     |
|                 | 2013 | -0.491             | -0.428 | -0.309 | -0.342 | -0.297 | 3.807 | V     |
|                 | 2014 | -0.340             | -0.363 | -0.292 | -0.434 | -0.390 | 2.512 | III   |
|                 | 2015 | -0.392             | -0.348 | -0.317 | -0.383 | -0.382 | 2.899 | III   |
|                 | 2016 | -0.455             | -0.406 | -0.342 | -0.444 | -0.361 | 3.562 | III   |
|                 | 2017 | -0.470             | -0.484 | -0.385 | -0.502 | -0.333 | 3.766 | V     |
|                 | 2018 | -0.416             | -0.405 | -0.294 | -0.472 | -0.374 | 3.045 | III   |
|                 | 2019 | -0.409             | -0.450 | -0.379 | -0.511 | -0.336 | 3.182 | V     |
|                 | 2020 | -0.368             | -0.451 | -0.451 | -0.516 | -0.366 | 2.856 | V     |
|                 | 2021 | -0.300             | -0.417 | -0.385 | -0.462 | -0.414 | 2.179 | I     |
| Jiangsu         | 2012 | -0.370             | -0.352 | -0.374 | -0.513 | -0.356 | 2.778 | II    |

| Province (city) | Year | Correlation degree |        |        |        |        |       | Grade      |
|-----------------|------|--------------------|--------|--------|--------|--------|-------|------------|
|                 |      | I                  | II     | III    | IV     | V      | j*    |            |
|                 | 2013 | -0.330             | -0.352 | -0.399 | -0.556 | -0.381 | 2.600 | <i>I</i>   |
|                 | 2014 | -0.254             | -0.290 | -0.362 | -0.529 | -0.415 | 2.295 | <i>I</i>   |
|                 | 2015 | -0.240             | -0.333 | -0.372 | -0.523 | -0.428 | 2.212 | <i>I</i>   |
|                 | 2016 | -0.223             | -0.358 | -0.384 | -0.523 | -0.439 | 2.130 | <i>I</i>   |
|                 | 2017 | -0.320             | -0.426 | -0.484 | -0.515 | -0.370 | 2.590 | <i>I</i>   |
|                 | 2018 | -0.361             | -0.460 | -0.473 | -0.532 | -0.391 | 2.703 | <i>I</i>   |
|                 | 2019 | -0.378             | -0.499 | -0.443 | -0.533 | -0.360 | 3.003 | <i>V</i>   |
|                 | 2020 | -0.183             | -0.440 | -0.475 | -0.570 | -0.457 | 2.066 | <i>I</i>   |
|                 | 2021 | -0.212             | -0.472 | -0.501 | -0.548 | -0.491 | 1.776 | <i>I</i>   |
| Zhejiang        | 2012 | -0.227             | -0.285 | -0.326 | -0.442 | -0.410 | 1.994 | <i>I</i>   |
|                 | 2013 | -0.329             | -0.356 | -0.366 | -0.464 | -0.370 | 2.563 | <i>I</i>   |
|                 | 2014 | -0.257             | -0.279 | -0.336 | -0.473 | -0.427 | 2.099 | <i>I</i>   |
|                 | 2015 | -0.222             | -0.249 | -0.345 | -0.474 | -0.451 | 1.911 | <i>I</i>   |
|                 | 2016 | -0.268             | -0.343 | -0.435 | -0.570 | -0.460 | 2.207 | <i>I</i>   |
|                 | 2017 | -0.304             | -0.360 | -0.410 | -0.514 | -0.424 | 2.296 | <i>I</i>   |
|                 | 2018 | -0.292             | -0.320 | -0.428 | -0.550 | -0.456 | 2.207 | <i>I</i>   |
|                 | 2019 | -0.197             | -0.301 | -0.401 | -0.533 | -0.515 | 1.795 | <i>I</i>   |
|                 | 2020 | -0.313             | -0.401 | -0.480 | -0.547 | -0.461 | 2.168 | <i>I</i>   |
|                 | 2021 | -0.269             | -0.415 | -0.452 | -0.584 | -0.478 | 2.187 | <i>I</i>   |
| Anhui           | 2012 | -0.358             | -0.226 | -0.281 | -0.400 | -0.418 | 2.275 | <i>II</i>  |
|                 | 2013 | -0.409             | -0.365 | -0.383 | -0.412 | -0.373 | 3.210 | <i>II</i>  |
|                 | 2014 | -0.303             | -0.282 | -0.268 | -0.439 | -0.449 | 2.111 | <i>III</i> |
|                 | 2015 | -0.304             | -0.292 | -0.276 | -0.455 | -0.461 | 2.078 | <i>III</i> |
|                 | 2016 | -0.248             | -0.315 | -0.339 | -0.508 | -0.486 | 1.963 | <i>I</i>   |
|                 | 2017 | -0.331             | -0.435 | -0.380 | -0.438 | -0.417 | 2.082 | <i>I</i>   |
|                 | 2018 | -0.273             | -0.361 | -0.276 | -0.456 | -0.472 | 2.054 | <i>I</i>   |
|                 | 2019 | -0.306             | -0.330 | -0.395 | -0.479 | -0.447 | 2.020 | <i>I</i>   |
|                 | 2020 | -0.260             | -0.298 | -0.332 | -0.478 | -0.486 | 1.903 | <i>I</i>   |
|                 | 2021 | -0.287             | -0.433 | -0.422 | -0.560 | -0.469 | 2.221 | <i>I</i>   |
| Jiangxi         | 2012 | -0.302             | -0.378 | -0.341 | -0.377 | -0.375 | 1.781 | <i>I</i>   |
|                 | 2013 | -0.431             | -0.365 | -0.340 | -0.391 | -0.265 | 3.840 | <i>V</i>   |
|                 | 2014 | -0.401             | -0.260 | -0.266 | -0.326 | -0.300 | 3.299 | <i>II</i>  |
|                 | 2015 | -0.347             | -0.277 | -0.245 | -0.401 | -0.343 | 2.702 | <i>III</i> |
|                 | 2016 | -0.338             | -0.260 | -0.286 | -0.429 | -0.371 | 2.493 | <i>II</i>  |
|                 | 2017 | -0.364             | -0.288 | -0.457 | -0.520 | -0.342 | 2.699 | <i>II</i>  |
|                 | 2018 | -0.370             | -0.312 | -0.386 | -0.490 | -0.371 | 2.652 | <i>II</i>  |
|                 | 2019 | -0.273             | -0.308 | -0.381 | -0.471 | -0.415 | 2.122 | <i>I</i>   |
|                 | 2020 | -0.321             | -0.417 | -0.470 | -0.528 | -0.432 | 2.298 | <i>I</i>   |
|                 | 2021 | -0.365             | -0.493 | -0.511 | -0.493 | -0.421 | 2.592 | <i>I</i>   |
| Hubei           | 2012 | -0.381             | -0.353 | -0.301 | -0.391 | -0.357 | 3.055 | <i>III</i> |
|                 | 2013 | -0.433             | -0.390 | -0.378 | -0.394 | -0.323 | 3.883 | <i>V</i>   |
|                 | 2014 | -0.382             | -0.249 | -0.308 | -0.377 | -0.375 | 2.488 | <i>II</i>  |
|                 | 2015 | -0.375             | -0.243 | -0.270 | -0.396 | -0.380 | 2.487 | <i>II</i>  |

| Province (city) | Year | Correlation degree |        |        |        |        |       | Grade      |
|-----------------|------|--------------------|--------|--------|--------|--------|-------|------------|
|                 |      | I                  | II     | III    | IV     | V      | j*    |            |
|                 | 2016 | -0.228             | -0.368 | -0.442 | -0.545 | -0.481 | 1.969 | <i>I</i>   |
|                 | 2017 | -0.338             | -0.400 | -0.452 | -0.548 | -0.400 | 2.548 | <i>I</i>   |
|                 | 2018 | -0.289             | -0.379 | -0.476 | -0.558 | -0.426 | 2.317 | <i>I</i>   |
|                 | 2019 | -0.333             | -0.366 | -0.460 | -0.489 | -0.392 | 2.405 | <i>I</i>   |
|                 | 2020 | -0.289             | -0.320 | -0.433 | -0.511 | -0.486 | 1.861 | <i>I</i>   |
|                 | 2021 | -0.266             | -0.535 | -0.536 | -0.570 | -0.488 | 1.947 | <i>I</i>   |
| Hunan           | 2012 | -0.402             | -0.347 | -0.322 | -0.376 | -0.273 | 3.791 | <i>V</i>   |
|                 | 2013 | -0.477             | -0.338 | -0.280 | -0.394 | -0.265 | 3.585 | <i>V</i>   |
|                 | 2014 | -0.438             | -0.214 | -0.231 | -0.370 | -0.323 | 3.122 | <i>II</i>  |
|                 | 2015 | -0.427             | -0.258 | -0.223 | -0.430 | -0.349 | 2.962 | <i>III</i> |
|                 | 2016 | -0.372             | -0.244 | -0.337 | -0.420 | -0.322 | 2.814 | <i>II</i>  |
|                 | 2017 | -0.436             | -0.402 | -0.394 | -0.480 | -0.301 | 3.496 | <i>V</i>   |
|                 | 2018 | -0.418             | -0.374 | -0.293 | -0.400 | -0.306 | 3.749 | <i>III</i> |
|                 | 2019 | -0.349             | -0.330 | -0.340 | -0.389 | -0.365 | 2.470 | <i>II</i>  |
|                 | 2020 | -0.348             | -0.322 | -0.340 | -0.367 | -0.378 | 2.230 | <i>II</i>  |
|                 | 2021 | -0.361             | -0.430 | -0.434 | -0.508 | -0.429 | 2.435 | <i>I</i>   |
| Chongqing       | 2012 | -0.425             | -0.410 | -0.453 | -0.558 | -0.267 | 3.248 | <i>V</i>   |
|                 | 2013 | -0.477             | -0.332 | -0.443 | -0.532 | -0.278 | 3.334 | <i>V</i>   |
|                 | 2014 | -0.406             | -0.236 | -0.388 | -0.516 | -0.320 | 2.851 | <i>II</i>  |
|                 | 2015 | -0.427             | -0.297 | -0.478 | -0.574 | -0.296 | 2.982 | <i>V</i>   |
|                 | 2016 | -0.354             | -0.388 | -0.501 | -0.529 | -0.340 | 2.785 | <i>V</i>   |
|                 | 2017 | -0.415             | -0.424 | -0.520 | -0.609 | -0.274 | 3.120 | <i>V</i>   |
|                 | 2018 | -0.435             | -0.418 | -0.538 | -0.544 | -0.290 | 3.334 | <i>V</i>   |
|                 | 2019 | -0.428             | -0.405 | -0.484 | -0.531 | -0.295 | 3.270 | <i>V</i>   |
|                 | 2020 | -0.297             | -0.367 | -0.399 | -0.456 | -0.397 | 2.206 | <i>I</i>   |
|                 | 2021 | -0.241             | -0.384 | -0.417 | -0.499 | -0.430 | 2.060 | <i>I</i>   |
| Sichuan         | 2012 | -0.402             | -0.359 | -0.291 | -0.300 | -0.259 | 3.865 | <i>V</i>   |
|                 | 2013 | -0.449             | -0.326 | -0.260 | -0.347 | -0.316 | 3.449 | <i>III</i> |
|                 | 2014 | -0.416             | -0.302 | -0.226 | -0.330 | -0.323 | 3.326 | <i>III</i> |
|                 | 2015 | -0.435             | -0.332 | -0.273 | -0.370 | -0.287 | 3.537 | <i>III</i> |
|                 | 2016 | -0.367             | -0.289 | -0.214 | -0.374 | -0.365 | 2.690 | <i>III</i> |
|                 | 2017 | -0.380             | -0.288 | -0.223 | -0.441 | -0.399 | 2.599 | <i>III</i> |
|                 | 2018 | -0.338             | -0.278 | -0.257 | -0.385 | -0.416 | 2.355 | <i>III</i> |
|                 | 2019 | -0.379             | -0.360 | -0.295 | -0.451 | -0.391 | 2.697 | <i>III</i> |
|                 | 2020 | -0.364             | -0.343 | -0.314 | -0.437 | -0.415 | 2.368 | <i>III</i> |
|                 | 2021 | -0.329             | -0.387 | -0.391 | -0.523 | -0.441 | 2.338 | <i>I</i>   |
| Yunnan          | 2012 | -0.423             | -0.333 | -0.465 | -0.457 | -0.262 | 3.513 | <i>V</i>   |
|                 | 2013 | -0.482             | -0.337 | -0.393 | -0.429 | -0.257 | 3.699 | <i>V</i>   |
|                 | 2014 | -0.468             | -0.310 | -0.349 | -0.427 | -0.353 | 3.260 | <i>II</i>  |
|                 | 2015 | -0.427             | -0.229 | -0.333 | -0.444 | -0.361 | 2.806 | <i>II</i>  |
|                 | 2016 | -0.360             | -0.301 | -0.411 | -0.495 | -0.400 | 2.458 | <i>II</i>  |
|                 | 2017 | -0.403             | -0.417 | -0.419 | -0.456 | -0.350 | 3.284 | <i>V</i>   |
|                 | 2018 | -0.422             | -0.336 | -0.489 | -0.496 | -0.402 | 3.230 | <i>II</i>  |

| Province (city) | Year | Correlation degree |        |        |        |        |       | Grade      |
|-----------------|------|--------------------|--------|--------|--------|--------|-------|------------|
|                 |      | I                  | II     | III    | IV     | V      | j*    |            |
|                 | 2019 | -0.438             | -0.362 | -0.441 | -0.484 | -0.355 | 3.131 | <i>V</i>   |
|                 | 2020 | -0.350             | -0.245 | -0.397 | -0.510 | -0.376 | 2.530 | <i>II</i>  |
|                 | 2021 | -0.342             | -0.413 | -0.424 | -0.506 | -0.342 | 2.815 | <i>I</i>   |
| Guizhou         | 2012 | -0.365             | -0.392 | -0.345 | -0.431 | -0.376 | 2.749 | <i>III</i> |
|                 | 2013 | -0.479             | -0.370 | -0.275 | -0.386 | -0.298 | 3.590 | <i>III</i> |
|                 | 2014 | -0.356             | -0.396 | -0.366 | -0.353 | -0.375 | 3.031 | <i>IV</i>  |
|                 | 2015 | -0.442             | -0.350 | -0.373 | -0.381 | -0.369 | 3.585 | <i>II</i>  |
|                 | 2016 | -0.368             | -0.328 | -0.383 | -0.451 | -0.384 | 2.548 | <i>II</i>  |
|                 | 2017 | -0.382             | -0.422 | -0.454 | -0.530 | -0.357 | 2.884 | <i>V</i>   |
|                 | 2018 | -0.419             | -0.363 | -0.390 | -0.400 | -0.377 | 3.606 | <i>II</i>  |
|                 | 2019 | -0.303             | -0.349 | -0.386 | -0.403 | -0.413 | 1.702 | <i>I</i>   |
|                 | 2020 | -0.325             | -0.414 | -0.458 | -0.410 | -0.404 | 2.449 | <i>I</i>   |
|                 | 2021 | -0.249             | -0.514 | -0.524 | -0.458 | -0.449 | 2.190 | <i>I</i>   |

**Table S5. Evaluation criteria of indicators.**

| Index | I         | II          | III         | IV          | V          |
|-------|-----------|-------------|-------------|-------------|------------|
| X1    | [0,250)   | [250,350)   | [350,450)   | [450,550)   | [550,1000) |
| X2    | [90,100)  | [80,90)     | [60,80)     | [50,60)     | [0,50)     |
| X3    | [0,10)    | [10,20)     | [20,40)     | [40,60)     | [60,100)   |
| X4    | [0,10)    | [10,15)     | [15,20)     | [20,25)     | [25,60)    |
| X5    | [0.75,1)  | [0.65,0.75) | [0.55,0.65) | [0.45,0.55) | [0,0.45)   |
| X6    | [90,100)  | [85,90)     | [80,85)     | [75,80)     | [0,75)     |
| X7    | [0.8,1)   | [0.65,0.8)  | [0.5,0.65)  | [0.35,0.5)  | [0,0.35)   |
| X8    | [0,10)    | [10,15)     | [15,20)     | [20,40)     | [40,100)   |
| X9    | [99,100)  | [97,99)     | [95,97)     | [93,95)     | [0,93)     |
| X10   | [99,100)  | [98,99)     | [95,98)     | [92,95)     | [0,92)     |
| X11   | [23,100)  | [17,23)     | [11,17)     | [5,11)      | [0,5)      |
| X12   | [2.5,3.5) | [2,2.5)     | [1.5,2)     | [1,1.5)     | [0,1)      |
| X13   | [95,100)  | [90,95)     | [85,90)     | [80,85)     | [0,80)     |
| X14   | [96,100)  | [93,96)     | [90,93)     | [60,90)     | [0,60)     |
| X15   | [0,1)     | [1,3)       | [3,5)       | [5,7)       | [7,10)     |
| X16   | [25,100)  | [15,25)     | [5,15)      | [3,5)       | [0,3)      |
| X17   | [0,50)    | [50,150)    | [150,250)   | [250,350)   | [350,500)  |
| X18   | [26,100)  | [19,26)     | [12,19)     | [5,12)      | [0,5)      |
| X19   | [14,15)   | [13,14)     | [12,13)     | [11,12)     | [0,11)     |
| X20   | [1,2)     | [0.8,1)     | [0.6,0.8)   | [0.4,0.6)   | [0,0.4)    |
| X21   | [80,100)  | [60,80)     | [40,60)     | [20,40)     | [0,20)     |
| X22   | [0,1)     | [1,2)       | [2,3)       | [3,5)       | [5,10)     |
| X23   | [85,100)  | [75,85)     | [65,75)     | [55,65)     | [0,55)     |
